# Supplementary material
Source: PubMed Central journal article supplement (PMC4011419)
Supplement: Supp_Fig2.pdf [file Supp_Fig2.pdf]

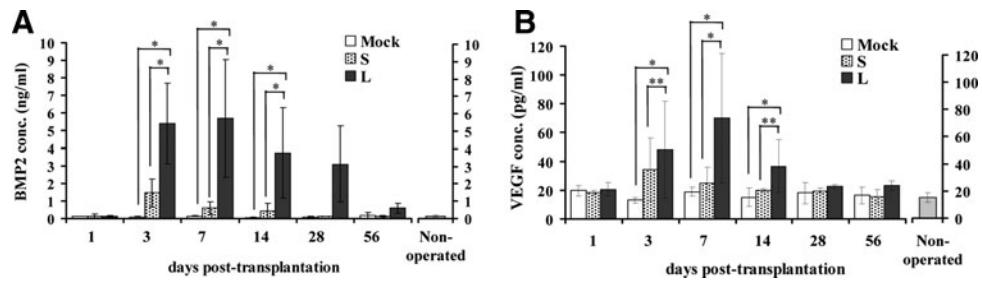

**SUPPLEMENTARY FIG. S2.** Transgene expression *in vivo*. **(A)** BMP2 concentrations in the serum. **(B)** VEGF concentrations in the serum. The L ( $n=6$ ), S ( $n=5$ ), and Mock ( $n=4$ ) groups were prepared as described in the text and transplanted into the critical-size (10 mm) femoral segmental bone defects in New Zealand White (NZW) rabbits. Serum samples were collected from the marginal ear vein and analyzed by ELISA kits for human BMP2 and VEGF, respectively. Before surgery, serum samples from nonoperated animals ( $n=8$ ) were collected for comparison. \* $p < 0.05$ , \*\* $p > 0.05$ .
