# Supplementary material
Source: PubMed Central journal article supplement (PMC4011419)
Supplement: Supp_Fig3-8.pdf [file Supp_Fig3-8.pdf]

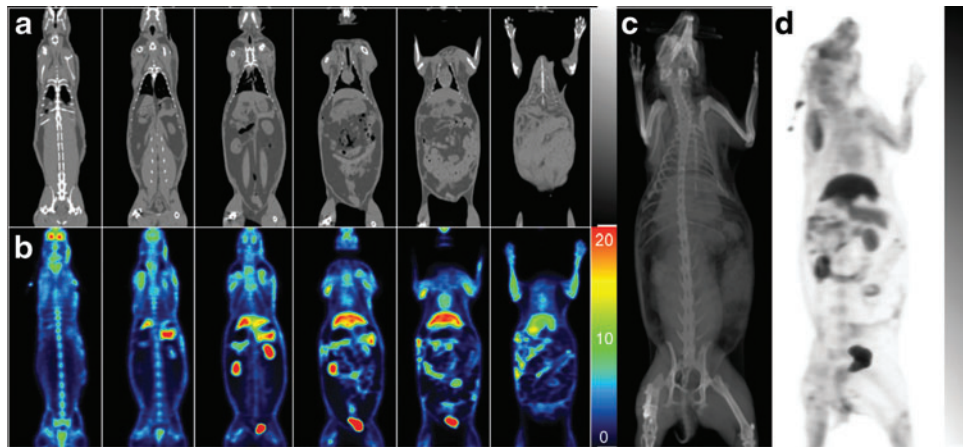

**SUPPLEMENTARY FIG. S3.** Tumor formation in #36 rabbit as assessed by positron emission tomography/computed tomography (PET/CT) scans at 8M. The experiments were performed as described in Figure 6.

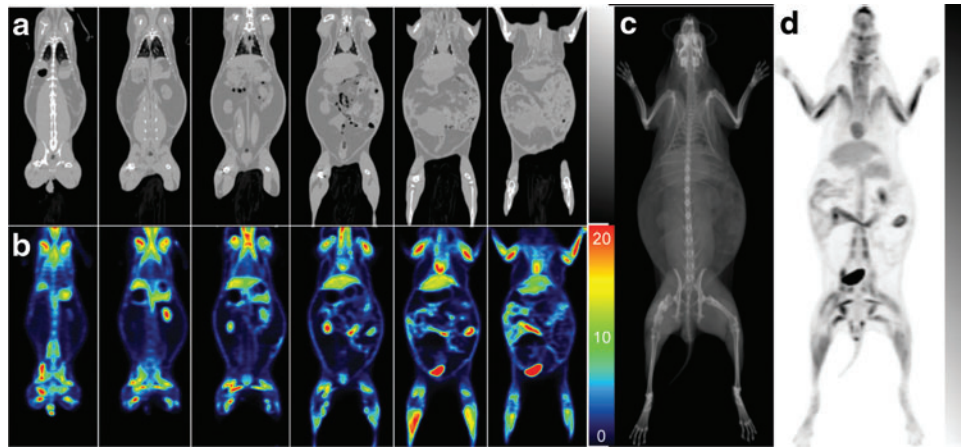

**SUPPLEMENTARY FIG. S4.** Tumor formation in #53 rabbit as assessed by PET/CT scans at 8M. The experiments were performed as described in Figure 6.

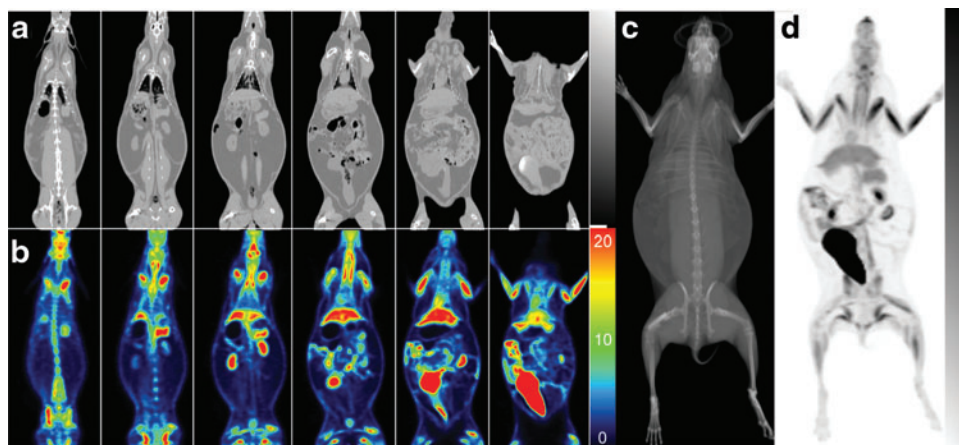

**SUPPLEMENTARY FIG. S5.** Tumor formation in #54 rabbit as assessed by PET/CT scans at 8M. The experiments were performed as described in Figure 6.

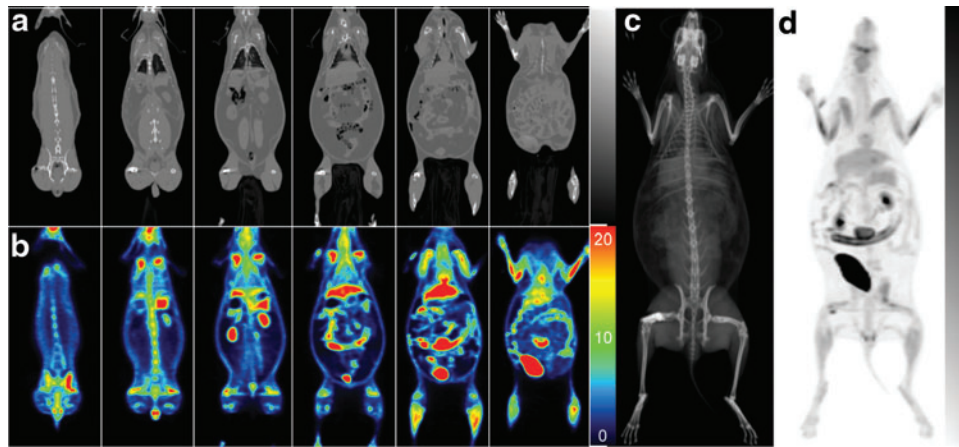

**SUPPLEMENTARY FIG. S6.** Tumor formation in #55 rabbit as assessed by PET/CT scans at 8M. The experiments were performed as described in Figure 6.

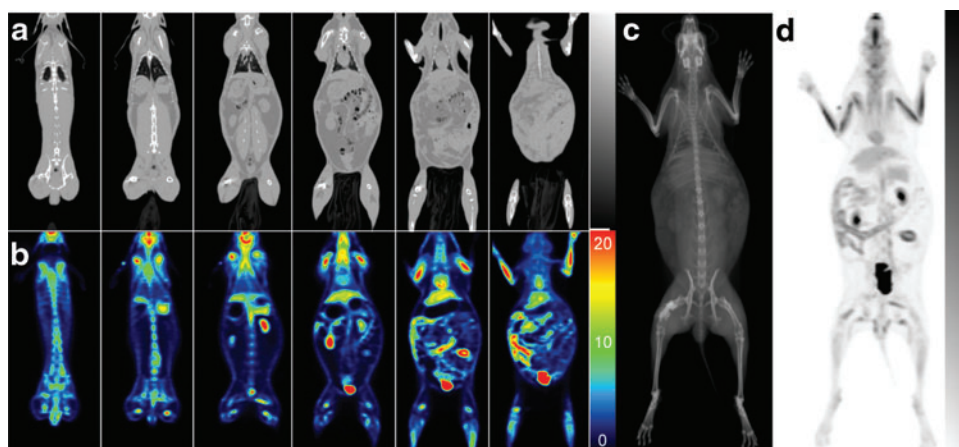

**SUPPLEMENTARY FIG. S7.** Tumor formation in #56 rabbit as assessed by PET/CT scans at 8M. The experiments were performed as described in Figure 6.

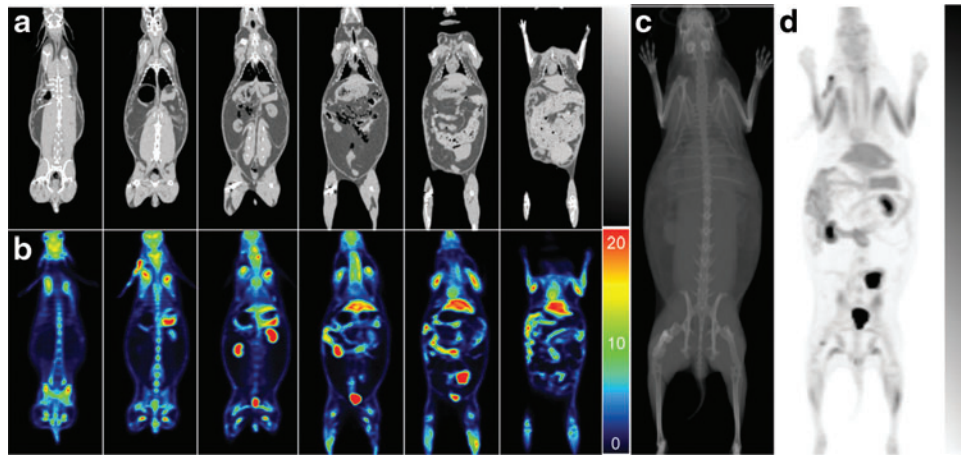

**SUPPLEMENTARY FIG. S8.** Tumor formation in #58 rabbit as assessed by PET/CT scans at 8M. The experiments were performed as described in Figure 6.
