# Supplementary material
Source: PubMed Central journal article supplement (PMC4011419)
Supplement: Supp_Table1.pdf [file Supp_Table1.pdf]

SUPPLEMENTARY TABLE S1. DETAILED EXPERIMENTAL DESIGN

| <i>Experimental design</i>                   |                   |                   |                   |                   |                   |
|----------------------------------------------|-------------------|-------------------|-------------------|-------------------|-------------------|
| <i>Number of transduced ASCs<sup>a</sup></i> |                   |                   |                   |                   |                   |
| <i>Group</i>                                 | <i>Mock</i>       | <i>Bac-CB</i>     | <i>Bac-CV</i>     | <i>Bac-FCBW</i>   | <i>Bac-FCVW</i>   |
| Mock                                         | $3.0 \times 10^6$ | –                 | –                 | –                 | –                 |
| S                                            | –                 | $2.4 \times 10^6$ | $0.6 \times 10^6$ | –                 | –                 |
| L                                            | –                 | –                 | –                 | $2.4 \times 10^6$ | $0.6 \times 10^6$ |

<sup>a</sup>All cell/scaffold groups were seeded with identical amounts of cells. Groups S comprised ASCs transduced with Bac-CB (MOI 100) and Bac-CV (MOI 100), which were mixed at a number ratio of 4:1. Group L was identical to group S except that viruses changed to BacFLP/Bac-FCBW and BacFLP/Bac-FCVW.

ASC, adipose-derived stem cell; MOI, multiplicity of infection.
