# Supplementary material
Source: PubMed Central journal article supplement (PMC4011419)
Supplement: Supp_Table2.pdf [file Supp_Table2.pdf]

SUPPLEMENTARY TABLE S2. BONE VOLUME AND PERCENTAGE OF TOTAL VOLUME FROM  $\mu$ CT DATA

| <i>Group</i> | <i>3M</i>                           |                                     | <i>8M</i>                           |                                     | <i>Number of animals</i> |
|--------------|-------------------------------------|-------------------------------------|-------------------------------------|-------------------------------------|--------------------------|
|              | <i>Bone volume (cm<sup>3</sup>)</i> | <i>Bone volume/total volume (%)</i> | <i>Bone volume (cm<sup>3</sup>)</i> | <i>Bone volume/total volume (%)</i> |                          |
| Mock         | 0.094 ± 0.042                       | 41.94 ± 18.75                       | 0.110 ± 0.020                       | 48.34 ± 8.85                        | 6                        |
| S            | 0.296 ± 0.105                       | 131.6 ± 46.5                        | 0.162 ± 0.031                       | 71.63 ± 13.75                       | 7                        |
| L            | 0.575 ± 0.127                       | 255.95 ± 56.6                       | 0.292 ± 0.063                       | 129.09 ± 27.97                      | 7                        |

$\mu$ CT, microcomputed tomography.
