# Supplementary material
Source: PubMed Central journal article supplement (PMC4011419)
Supplement: Supp_Table3.pdf [file Supp_Table3.pdf]

SUPPLEMENTARY TABLE S3. BONE DENSITY AND PERCENTAGE OF TOTAL DENSITY FROM  $\mu$ CT DATA

| <i>Group</i> | <i>3M</i>                |                                        | <i>8M</i>                |                                        | <i>Number of animals</i> |
|--------------|--------------------------|----------------------------------------|--------------------------|----------------------------------------|--------------------------|
|              | <i>Bone density (HU)</i> | <i>Bone density/ total density (%)</i> | <i>Bone density (HU)</i> | <i>Bone density/ total density (%)</i> |                          |
| Mock         | 749.68 ± 257.21          | 16.55 ± 5.68                           | 961.04 ± 212.44          | 22.11 ± 4.89                           | 6                        |
| S            | 1471.48 ± 302.25         | 32.48 ± 6.67                           | 1800.63 ± 252.62         | 41.42 ± 5.81                           | 7                        |
| L            | 3520.36 ± 315.58         | 77.71 ± 6.97                           | 3992.18 ± 521.28         | 91.84 ± 11.99                          | 7                        |

HU, Hounsfield unit.
